# Supplementary material
Source: PubMed Central journal article supplement (PMC5285373)

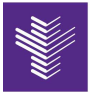

11/5/2016

«pat\_first\_name» «pat\_last\_name»  
«addr1» «addr2»  
«city», TX «zip»

Dear «Eng\_prefix». «pat\_first\_name» «pat\_last\_name»,

There are two things your doctors at Parkland Health & Hospital System want you to know:

- 1) Your risk of getting liver cancer goes up if you have liver disease.
- 2) Screening tests can find many liver problems early, so problems can be treated before they get serious.

That's why we're inviting you to have a liver ultrasound and a simple blood test – two of the screening tests for liver cancer. Research has shown that these tests can have big benefits. If everyone with liver disease did these tests every 6 months, there would be many fewer deaths from liver cancer.

A liver ultrasound is quick and painless procedure. During a liver ultrasound, you lie on a table while the doctor puts some gel on the skin above your stomach. Then the doctor touches your skin with a wand to look at images of your liver on a computer screen. If the test is normal, you repeat the test in 6 months.

Parkland Financial Assistance (previously Parkland Health Plus) and private insurance usually covers part, if not all, of the cost of a liver ultrasound. You may want to check with Parkland Financial Services to see what your coverage will be.

Please call «projnum» to make an appointment for your liver ultrasound.

Sincerely,

Dr. Noel Santini  
Medical Director of Adult Medicine  
Community Oriented Primary Care  
Parkland Health & Hospital System

Amit Singal, MD  
Division of Digestive and Liver Diseases  
Department of Internal Medicine  
Parkland-UT Southwestern Patient  
Centered Outcomes Research Center

| ARM 2 Invitation Call Scripts |                                                                                                                                                                                                                                                                                                                                                                                                                                                                                             |                             |       |                                                    |
|-------------------------------|---------------------------------------------------------------------------------------------------------------------------------------------------------------------------------------------------------------------------------------------------------------------------------------------------------------------------------------------------------------------------------------------------------------------------------------------------------------------------------------------|-----------------------------|-------|----------------------------------------------------|
| STEP                          | ENGLISH SCRIPT                                                                                                                                                                                                                                                                                                                                                                                                                                                                              | BUTTON                      | NEXT  | WORKFLOW                                           |
| 0                             | Select in the top portion of this window what number you will be dialing, then click Continue.                                                                                                                                                                                                                                                                                                                                                                                              | CONTINUE                    | to 1  |                                                    |
| 1                             | Dial «numdial» and wait for an answer. Then click the button below indicating how the call was answered...                                                                                                                                                                                                                                                                                                                                                                                  | No answer                   | NA    |                                                    |
|                               |                                                                                                                                                                                                                                                                                                                                                                                                                                                                                             | Busy                        | B     |                                                    |
|                               |                                                                                                                                                                                                                                                                                                                                                                                                                                                                                             | Answering machine           | to 2  |                                                    |
|                               |                                                                                                                                                                                                                                                                                                                                                                                                                                                                                             | Person                      | to 3  |                                                    |
| 2                             | Hello, good «morningafternoonevening». This message is for «Eng_prefix» «pat_first_name» «pat_last_name». My name is «RA_first_name» and I am calling on behalf of Parkland Hospital about the letter you received in the mail inviting you to have a liver ultrasound and a simple blood test . Doctors recommend these screening tests for patients [with liver disease/who may have liver disease]. If you would like to call us back, you can do so at: «projnum». Thank you, good bye. | END CALL                    | AMM   |                                                    |
| 3                             | Hello, good «morningafternoonevening». My name is «RA_first_name» and I am calling on behalf of Parkland Hospital. Is «Eng_prefix» «pat_first_name» «pat_last_name» available?                                                                                                                                                                                                                                                                                                              | Not at this number          | to 4  |                                                    |
|                               |                                                                                                                                                                                                                                                                                                                                                                                                                                                                                             | Not available               | to 5  |                                                    |
|                               |                                                                                                                                                                                                                                                                                                                                                                                                                                                                                             | Available                   | to 8  |                                                    |
| 4                             | Am I calling «numdial»?                                                                                                                                                                                                                                                                                                                                                                                                                                                                     | Yes, wrong number           | WN    |                                                    |
|                               |                                                                                                                                                                                                                                                                                                                                                                                                                                                                                             | No, misdiald                | MD    |                                                    |
| 5                             | Is this the best phone number to reach «herhim»?                                                                                                                                                                                                                                                                                                                                                                                                                                            | No                          | to 6  |                                                    |
|                               |                                                                                                                                                                                                                                                                                                                                                                                                                                                                                             | Yes                         | to 7  |                                                    |
| 6                             | What is the best phone number to reach «herhim»? [Record number.]                                                                                                                                                                                                                                                                                                                                                                                                                           | No update                   | to 7  |                                                    |
|                               |                                                                                                                                                                                                                                                                                                                                                                                                                                                                                             | Update info                 | to 7  | RECORDNUMBER<br>[tbl_callhistory.call_best.number] |
| 7                             | When would be a convenient time to reach «herhim»? [Record time.]                                                                                                                                                                                                                                                                                                                                                                                                                           | CONTINUE                    | to 16 | RECORDTIME<br>[tbl_callhistory.call_best.time]     |
| 8                             | Hi «Eng_prefix» «pat_last_name», I work with Parkland Hospital and we are inviting patients to have two of the screening tests for liver cancer. Did you receive the invitation in the mail?                                                                                                                                                                                                                                                                                                | No                          | to 9  |                                                    |
|                               |                                                                                                                                                                                                                                                                                                                                                                                                                                                                                             | Yes                         | to 13 | LETTERREC                                          |
| 9                             | Would you like me to resend the letter to your address?                                                                                                                                                                                                                                                                                                                                                                                                                                     | No                          | to 11 |                                                    |
|                               |                                                                                                                                                                                                                                                                                                                                                                                                                                                                                             | Yes                         | to 10 | LETTERRESEND                                       |
| 10                            | We have the following address on file:<br>«pat_first_name» «pat_last_name»<br>«addr1» «addr2»<br>«city», TX «zip»<br>Is this your correct address? [If no, record new address.]                                                                                                                                                                                                                                                                                                             | No update                   | to 11 | BESTAddressYN<br>[tbl_addresses row]               |
|                               |                                                                                                                                                                                                                                                                                                                                                                                                                                                                                             | Update info                 | to 11 |                                                    |
| 11                            | The reason we are calling is to invite you to have a liver ultrasound. I would like to go ahead and read you the letter.                                                                                                                                                                                                                                                                                                                                                                    | No, never interested        | to 15 |                                                    |
|                               |                                                                                                                                                                                                                                                                                                                                                                                                                                                                                             | No, not interested now      | to 15 | PARTICIPATEYN                                      |
|                               |                                                                                                                                                                                                                                                                                                                                                                                                                                                                                             | Maybe later                 | to 15 |                                                    |
|                               |                                                                                                                                                                                                                                                                                                                                                                                                                                                                                             | Resend letter and call back | to 20 |                                                    |
|                               |                                                                                                                                                                                                                                                                                                                                                                                                                                                                                             | Yes, read letter            | to 12 | READLETTER                                         |
| 12                            | The letter says:<br><b>[LETTER]</b><br>That's it!                                                                                                                                                                                                                                                                                                                                                                                                                                           | CONTINUE                    | to 14 |                                                    |

|                     |                                                                                                                                                                                                                                                                                                                                                                                                                                                                                                                                                                                                                                                                                                                           |                        |                                                           |                                       |
|---------------------|---------------------------------------------------------------------------------------------------------------------------------------------------------------------------------------------------------------------------------------------------------------------------------------------------------------------------------------------------------------------------------------------------------------------------------------------------------------------------------------------------------------------------------------------------------------------------------------------------------------------------------------------------------------------------------------------------------------------------|------------------------|-----------------------------------------------------------|---------------------------------------|
| 13                  | As you may have read, we're inviting you to have a liver ultrasound and a simple blood test – two of the screening tests for liver cancer. Research has shown that these tests can have big benefits. If everyone who has or may have liver disease did these tests every 6 months, there would be many fewer deaths from liver cancer.                                                                                                                                                                                                                                                                                                                                                                                   | CONTINUE               | to 14                                                     |                                       |
| 14                  | Would you like to take advantage of this screening opportunity?<br><b>[If already scheduled, ask: Would you like to have the simple blood test?]</b><br><b>If yes, select: AFP only.]</b>                                                                                                                                                                                                                                                                                                                                                                                                                                                                                                                                 | No, never interested   | to 15                                                     |                                       |
|                     |                                                                                                                                                                                                                                                                                                                                                                                                                                                                                                                                                                                                                                                                                                                           | No, not interested now | to 15                                                     | PARTICIPATEYN                         |
|                     |                                                                                                                                                                                                                                                                                                                                                                                                                                                                                                                                                                                                                                                                                                                           | Maybe later            | to 15                                                     |                                       |
|                     |                                                                                                                                                                                                                                                                                                                                                                                                                                                                                                                                                                                                                                                                                                                           | AFP only               | to 23                                                     |                                       |
|                     |                                                                                                                                                                                                                                                                                                                                                                                                                                                                                                                                                                                                                                                                                                                           | Yes, interested        | to 21                                                     |                                       |
| 15                  | People have different concerns when it comes to getting tested for cancer. Would you mind sharing the reason or reasons why you do not want to have a liver ultrasound?<br><b>[Check all that apply.]</b><br><ul style="list-style-type: none"> <li>• Cost of the test</li> <li>• Prep involved</li> <li>• Pain during the test</li> <li>• Time it takes to do the test</li> <li>• Having to take a day off of work</li> <li>• Potential risks</li> <li>• Clothing during test</li> <li>• Chance that a test might find a problem</li> <li>• Liver cancer screening doesn't apply to me</li> <li>• Already had liver ultrasound (project or usual care)</li> <li>• Other reason</li> <li>• Don't want to share</li> </ul> | Cost                   | If OPT go to 17;<br>If NI now go to 18;<br>If ML go to 19 | COST [0=No;1=Yes]                     |
|                     |                                                                                                                                                                                                                                                                                                                                                                                                                                                                                                                                                                                                                                                                                                                           | Prep                   |                                                           | PREP [0=No;1=Yes]                     |
|                     |                                                                                                                                                                                                                                                                                                                                                                                                                                                                                                                                                                                                                                                                                                                           | Pain                   |                                                           | PAIN [0=No;1=Yes]                     |
|                     |                                                                                                                                                                                                                                                                                                                                                                                                                                                                                                                                                                                                                                                                                                                           | Time                   |                                                           | TIME [0=No;1=Yes]                     |
|                     |                                                                                                                                                                                                                                                                                                                                                                                                                                                                                                                                                                                                                                                                                                                           | Work                   |                                                           | WORK [0=No;1=Yes]                     |
|                     |                                                                                                                                                                                                                                                                                                                                                                                                                                                                                                                                                                                                                                                                                                                           | Risk                   |                                                           | RISK [0=No;1=Yes]                     |
|                     |                                                                                                                                                                                                                                                                                                                                                                                                                                                                                                                                                                                                                                                                                                                           | Clothing               |                                                           | CLOTH [0=No;1=Yes]                    |
|                     |                                                                                                                                                                                                                                                                                                                                                                                                                                                                                                                                                                                                                                                                                                                           | Problem                |                                                           | PROB [0=No;1=Yes]                     |
|                     |                                                                                                                                                                                                                                                                                                                                                                                                                                                                                                                                                                                                                                                                                                                           | Doesn't apply          |                                                           | DNA [0=No;1=Yes]                      |
|                     |                                                                                                                                                                                                                                                                                                                                                                                                                                                                                                                                                                                                                                                                                                                           | Screen up-to-date      |                                                           | UTD [0=No;1=Yes]                      |
|                     |                                                                                                                                                                                                                                                                                                                                                                                                                                                                                                                                                                                                                                                                                                                           | Other                  |                                                           | OTH [0=No; 1=Yes]<br>RECORD REASON(S) |
| Don't want to share | DNS [0=No;1=Yes]                                                                                                                                                                                                                                                                                                                                                                                                                                                                                                                                                                                                                                                                                                          |                        |                                                           |                                       |
| 16                  | Thank you so much for your time. Have a good «dayevening».                                                                                                                                                                                                                                                                                                                                                                                                                                                                                                                                                                                                                                                                | END CALL               | NH                                                        |                                       |
| 17                  | Thank you for speaking with me today. We will remove you from our contact list. Have a good «dayevening».                                                                                                                                                                                                                                                                                                                                                                                                                                                                                                                                                                                                                 | END CALL               | OPT                                                       | CENSOR                                |
| 18                  | Thank you for speaking with me today. We will make a note that you are not interested at this time. Have a good «dayevening».                                                                                                                                                                                                                                                                                                                                                                                                                                                                                                                                                                                             | END CALL               | NI                                                        | INVITE IN 3 MO.                       |
| 19                  | Thank you for speaking with me today. We will make a note that you may be interested in the future. If you would like to call us back, you can do so at: «projnum». Have a good «dayevening».                                                                                                                                                                                                                                                                                                                                                                                                                                                                                                                             | END CALL               | ML                                                        | INVITE IN 3 MO.                       |
| 20                  | Thank you so much for your time. We will resend the letter and call you back. Have a good <<dayevening>>.                                                                                                                                                                                                                                                                                                                                                                                                                                                                                                                                                                                                                 | END CALL               | PC                                                        |                                       |
| 21                  | Parkland Financial Assistance (previously Parkland Health Plus) and private insurance usually covers part, if not all, of the cost of a liver ultrasound. Do you have Parkland Financial Assistance or private insurance?                                                                                                                                                                                                                                                                                                                                                                                                                                                                                                 | No                     | to 18                                                     | [QualifyCriteriaMetYN,dte_consent]    |
|                     |                                                                                                                                                                                                                                                                                                                                                                                                                                                                                                                                                                                                                                                                                                                           | Don't know             | to 18                                                     |                                       |
|                     |                                                                                                                                                                                                                                                                                                                                                                                                                                                                                                                                                                                                                                                                                                                           | Yes                    | to 19                                                     |                                       |
| 22                  | Okay. I can give you the number to Parkland's Financial Services so you can ask what your coverage will be. It is «finacialnum». We will make a note to contact you again in the future. If you would like to call us back, you can do so at: «projnum». Have a good «dayevening».                                                                                                                                                                                                                                                                                                                                                                                                                                        | END CALL               | PFS                                                       | INVITE IN 3 MO.                       |

|    |                                                                                                                                                                                                                                                                                                                                                                                                                                                                                                                                                                                                                                                                                      |          |   |               |
|----|--------------------------------------------------------------------------------------------------------------------------------------------------------------------------------------------------------------------------------------------------------------------------------------------------------------------------------------------------------------------------------------------------------------------------------------------------------------------------------------------------------------------------------------------------------------------------------------------------------------------------------------------------------------------------------------|----------|---|---------------|
| 23 | <p>Okay. We will submit a request. &lt;&lt;The Radiology department will contact you by phone in about a week to schedule the appointment for your liver ultrasound.&gt;&gt;The blood test will be scheduled for the same day as your ultrasound. It will be in the main Parkland lab after your ultrasound.</p> <p>If you become uninsured or lose your insurance coverage prior to this appointment, you may be required to pay for these services out of pocket. If you have any questions, I can give you the number to Parkland's Financial Services. It is «finacialnum».</p> <p>If you would like to call us back, you can do so at: «projnum». Have a good «dayevening».</p> | END CALL | C | REQUEST ORDER |
|----|--------------------------------------------------------------------------------------------------------------------------------------------------------------------------------------------------------------------------------------------------------------------------------------------------------------------------------------------------------------------------------------------------------------------------------------------------------------------------------------------------------------------------------------------------------------------------------------------------------------------------------------------------------------------------------------|----------|---|---------------|

| ARM 3 Invitation Call Scripts |                                                                                                                                                                                                                                                                                                                                                                                                                                                                                             |                      |       |                                                    |
|-------------------------------|---------------------------------------------------------------------------------------------------------------------------------------------------------------------------------------------------------------------------------------------------------------------------------------------------------------------------------------------------------------------------------------------------------------------------------------------------------------------------------------------|----------------------|-------|----------------------------------------------------|
| STEP                          | ENGLISH SCRIPT                                                                                                                                                                                                                                                                                                                                                                                                                                                                              | BUTTON               | NEXT  | WORKFLOW                                           |
| 0                             | Select in the top portion of this window what number you will be dialing, then click Continue.                                                                                                                                                                                                                                                                                                                                                                                              | CONTINUE             | to 1  |                                                    |
| 1                             | Dial «numdial» and wait for an answer. Then click the button below indicating how the call was answered...                                                                                                                                                                                                                                                                                                                                                                                  | No answer            | NA    |                                                    |
|                               |                                                                                                                                                                                                                                                                                                                                                                                                                                                                                             | Busy                 | B     |                                                    |
|                               |                                                                                                                                                                                                                                                                                                                                                                                                                                                                                             | Answering machine    | to 2  |                                                    |
|                               |                                                                                                                                                                                                                                                                                                                                                                                                                                                                                             | Person               | to 3  |                                                    |
| 2                             | Hello, good «morningafternoonevening». This message is for «Eng_prefix» «pat_first_name» «pat_last_name». My name is «RA_first_name» and I am calling on behalf of Parkland Hospital about the letter you received in the mail inviting you to have a liver ultrasound and a simple blood test . Doctors recommend these screening tests for patients [with liver disease/who may have liver disease]. If you would like to call us back, you can do so at: «projnum». Thank you, good bye. | END CALL             | AMM   |                                                    |
| 3                             | Hello, good «morningafternoonevening». My name is «RA_first_name» and I am calling on behalf of Parkland Hospital. Is «Eng_prefix» «pat_first_name» «pat_last_name» available?                                                                                                                                                                                                                                                                                                              | Not at this number   | to 4  |                                                    |
|                               |                                                                                                                                                                                                                                                                                                                                                                                                                                                                                             | Not available        | to 5  |                                                    |
|                               |                                                                                                                                                                                                                                                                                                                                                                                                                                                                                             | Available            | to 8  |                                                    |
| 4                             | Am I calling «numdial»?                                                                                                                                                                                                                                                                                                                                                                                                                                                                     | Yes, not best number | to 6  |                                                    |
|                               |                                                                                                                                                                                                                                                                                                                                                                                                                                                                                             | Yes, wrong number    | WN    |                                                    |
|                               |                                                                                                                                                                                                                                                                                                                                                                                                                                                                                             | No, misdialed        | MD    |                                                    |
| 5                             | Is this the best phone number to reach «herhim»?                                                                                                                                                                                                                                                                                                                                                                                                                                            | No                   | to 6  |                                                    |
|                               |                                                                                                                                                                                                                                                                                                                                                                                                                                                                                             | Yes                  | to 7  |                                                    |
| 6                             | What is the best phone number to reach «herhim»? [Record number.]                                                                                                                                                                                                                                                                                                                                                                                                                           | No update            | to 7  |                                                    |
|                               |                                                                                                                                                                                                                                                                                                                                                                                                                                                                                             | Update info          | to 7  | RECORDNUMBER<br>[tbl_callhistory.call_best.number] |
| 7                             | When would be a convenient time to reach «herhim»? [Record time.]                                                                                                                                                                                                                                                                                                                                                                                                                           | CONTINUE             | to 18 | RECORDTIME<br>[tbl_callhistory.call_best.time]     |
| 8                             | Hi «Eng_prefix» «pat_last_name», I work with Parkland Hospital and we are inviting patients to have two of the screening tests for liver cancer. Did you receive the invitation in the mail?                                                                                                                                                                                                                                                                                                | No                   | to 9  |                                                    |
|                               |                                                                                                                                                                                                                                                                                                                                                                                                                                                                                             | Yes                  | to 13 | LETTERREC                                          |
| 9                             | Would you like me to resend the letter to your address?                                                                                                                                                                                                                                                                                                                                                                                                                                     | No                   | to 11 |                                                    |
|                               |                                                                                                                                                                                                                                                                                                                                                                                                                                                                                             | Yes                  | to 10 | LETTERRESEND                                       |

|    |                                                                                                                                                                                                                                                                                                                                                                                                                                                                                                                                                                                                                                                                                                                        |                                                       |                  |                                       |
|----|------------------------------------------------------------------------------------------------------------------------------------------------------------------------------------------------------------------------------------------------------------------------------------------------------------------------------------------------------------------------------------------------------------------------------------------------------------------------------------------------------------------------------------------------------------------------------------------------------------------------------------------------------------------------------------------------------------------------|-------------------------------------------------------|------------------|---------------------------------------|
| 10 | We have the following address on file:<br>«pat_first_name» «pat_last_name»<br>«addr1» «addr2»<br>«city», TX «zip»<br>Is this your correct address? <b>[If no, record new address.]</b>                                                                                                                                                                                                                                                                                                                                                                                                                                                                                                                                 | No update                                             | to 11            | RECORDADDRESS<br>[tbl_.....]          |
|    |                                                                                                                                                                                                                                                                                                                                                                                                                                                                                                                                                                                                                                                                                                                        | Update info                                           | to 11            |                                       |
| 11 | The reason we are calling is to invite you to have a liver ultrasound. I would like to go ahead and read you the letter.                                                                                                                                                                                                                                                                                                                                                                                                                                                                                                                                                                                               | No, never interested                                  | to 15            |                                       |
|    |                                                                                                                                                                                                                                                                                                                                                                                                                                                                                                                                                                                                                                                                                                                        | No, not interested now                                | to 15            | PARTICIPATEYN                         |
|    |                                                                                                                                                                                                                                                                                                                                                                                                                                                                                                                                                                                                                                                                                                                        | Maybe later                                           | to 15            |                                       |
|    |                                                                                                                                                                                                                                                                                                                                                                                                                                                                                                                                                                                                                                                                                                                        | Resend letter and call back                           | to 22            |                                       |
|    |                                                                                                                                                                                                                                                                                                                                                                                                                                                                                                                                                                                                                                                                                                                        | Yes, read letter                                      | to 12            | READLETTER                            |
| 12 | The letter says:<br><b>[LETTER]</b><br>That's it!                                                                                                                                                                                                                                                                                                                                                                                                                                                                                                                                                                                                                                                                      | CONTINUE                                              | to 14            |                                       |
| 13 | As you may have read, we're inviting you to have a liver ultrasound and a simple blood test – two of the screening tests for liver cancer. Research has shown that these tests can have big benefits. If everyone who has or may have liver disease did these tests every 6 months, there would be many fewer deaths from liver cancer.                                                                                                                                                                                                                                                                                                                                                                                | CONTINUE                                              | to 14            |                                       |
| 14 | Would you like to take advantage of this screening opportunity?<br><b>[If already scheduled, ask: Would you like to have the simple blood test?]</b><br><b>If yes, select: AFP only.]</b>                                                                                                                                                                                                                                                                                                                                                                                                                                                                                                                              | No, never interested                                  | to 15            |                                       |
|    |                                                                                                                                                                                                                                                                                                                                                                                                                                                                                                                                                                                                                                                                                                                        | No, not interested now                                | to 15            | PARTICIPATEYN                         |
|    |                                                                                                                                                                                                                                                                                                                                                                                                                                                                                                                                                                                                                                                                                                                        | Maybe later                                           | to 15            |                                       |
|    |                                                                                                                                                                                                                                                                                                                                                                                                                                                                                                                                                                                                                                                                                                                        | AFP only                                              | to 25            |                                       |
|    |                                                                                                                                                                                                                                                                                                                                                                                                                                                                                                                                                                                                                                                                                                                        | Yes, interested                                       | to 23            |                                       |
| 15 | People have different concerns when it comes to getting tested for cancer. Would you mind sharing the reason or reasons why you do not want to have a liver ultrasound? <b>[Check all that apply.]</b><br><ul style="list-style-type: none"> <li>• Cost of the test</li> <li>• Prep involved</li> <li>• Pain during the test</li> <li>• Time it takes to do the test</li> <li>• Having to take a day off of work</li> <li>• Potential risks</li> <li>• Clothing during test</li> <li>• Chance that a test might find a problem</li> <li>• Liver cancer screening doesn't apply to me</li> <li>• Already had liver ultrasound (project or usual care)</li> <li>• Other reason</li> <li>• Don't want to share</li> </ul> | Cost                                                  | to 28            | COST [0=No;1=Yes]                     |
|    |                                                                                                                                                                                                                                                                                                                                                                                                                                                                                                                                                                                                                                                                                                                        | Prep                                                  | to 16            | PREP [0=No;1=Yes]                     |
|    |                                                                                                                                                                                                                                                                                                                                                                                                                                                                                                                                                                                                                                                                                                                        | Pain                                                  | to 16            | PAIN [0=No;1=Yes]                     |
|    |                                                                                                                                                                                                                                                                                                                                                                                                                                                                                                                                                                                                                                                                                                                        | Time                                                  | to 16            | TIME [0=No;1=Yes]                     |
|    |                                                                                                                                                                                                                                                                                                                                                                                                                                                                                                                                                                                                                                                                                                                        | Work                                                  | to 16            | WORK [0=No;1=Yes]                     |
|    |                                                                                                                                                                                                                                                                                                                                                                                                                                                                                                                                                                                                                                                                                                                        | Risk                                                  | to 16            | RISK [0=No;1=Yes]                     |
|    |                                                                                                                                                                                                                                                                                                                                                                                                                                                                                                                                                                                                                                                                                                                        | Clothing                                              | to 16            | CLOTH [0=No;1=Yes]                    |
|    |                                                                                                                                                                                                                                                                                                                                                                                                                                                                                                                                                                                                                                                                                                                        | Problem                                               | to 16            | PROB [0=No;1=Yes]                     |
|    |                                                                                                                                                                                                                                                                                                                                                                                                                                                                                                                                                                                                                                                                                                                        | Doesn't apply                                         | to 16            | DNA [0=No;1=Yes]                      |
|    |                                                                                                                                                                                                                                                                                                                                                                                                                                                                                                                                                                                                                                                                                                                        | Screen up-to-date                                     | to 16            | UTD [0=No;1=Yes]                      |
|    |                                                                                                                                                                                                                                                                                                                                                                                                                                                                                                                                                                                                                                                                                                                        | Other                                                 | to 16            | OTH [0=No; 1=Yes]<br>RECORD REASON(S) |
|    | Don't want to share                                                                                                                                                                                                                                                                                                                                                                                                                                                                                                                                                                                                                                                                                                    | If OPT go to 19;<br>If NI go to 20;<br>If ML go to 21 | DNS [0=No;1=Yes] |                                       |
| 16 | There is no preparation required for a liver ultrasound. Fasting for 8 hours is recommended for best results but not required.                                                                                                                                                                                                                                                                                                                                                                                                                                                                                                                                                                                         |                                                       |                  |                                       |
|    | A liver ultrasound is a painless procedure. During a liver ultrasound, you lie on a table while the doctor puts some gel on the skin above your stomach. The gel won't stain your clothing or hurt your skin. Then the doctor touches your skin with a wand to look at images of your liver on a computer screen.                                                                                                                                                                                                                                                                                                                                                                                                      | CONTINUE                                              | to 24            |                                       |

|    |                                                                                                                                                                                                                                                                                                                                                                                                                                                                                                                                                                                                                                                                                                                                                                                                                                                                                                                                                                                                                                                                                                                                                                                                                                                                                                                                                                                                                                                                                                                                                                                                                                                                                                                                                                                                                                                                                                                                                                                                                                                                                                                                                                                                                                                                                                                                       |                                                                                                     |                                                     |                 |
|----|---------------------------------------------------------------------------------------------------------------------------------------------------------------------------------------------------------------------------------------------------------------------------------------------------------------------------------------------------------------------------------------------------------------------------------------------------------------------------------------------------------------------------------------------------------------------------------------------------------------------------------------------------------------------------------------------------------------------------------------------------------------------------------------------------------------------------------------------------------------------------------------------------------------------------------------------------------------------------------------------------------------------------------------------------------------------------------------------------------------------------------------------------------------------------------------------------------------------------------------------------------------------------------------------------------------------------------------------------------------------------------------------------------------------------------------------------------------------------------------------------------------------------------------------------------------------------------------------------------------------------------------------------------------------------------------------------------------------------------------------------------------------------------------------------------------------------------------------------------------------------------------------------------------------------------------------------------------------------------------------------------------------------------------------------------------------------------------------------------------------------------------------------------------------------------------------------------------------------------------------------------------------------------------------------------------------------------------|-----------------------------------------------------------------------------------------------------|-----------------------------------------------------|-----------------|
|    | <p>You will feel no pain but may be asked to change positions or hold your breath during the test.</p> <p>A liver ultrasound is a quick procedure. The ultrasound usually takes less than 30 minutes and the appointment should take around 1 hour from start to finish.</p> <p>Liver ultrasounds do not require you to take an entire day off work. With planning, most people are able to take the time to complete a test.</p> <p>A liver ultrasound is a safe procedure. An ultrasound takes pictures of organs inside the body. It does not use X-rays or other types of radiation.</p> <p>Your privacy is very important to us. You will be asked to wear comfortable, loose clothing. The doctor will have you lift up your shirt and possibly slide your pants down to expose only your stomach.</p> <p>Liver cancer testing is important. It could even save your life. That's why we mailed you an invitation to have a liver ultrasound – one of the screening tests for liver cancer. This screening test can actually find many liver problems early, so problems can be treated before they get serious. If ignored, these problems typically get worse without treatment.</p> <p>Your lab results suggest that you have or may have liver disease. This means you are possibly at increased risk for developing liver cancer in the future. Liver cancer often does not cause symptoms until it is in its later stages, so it is seldom found early without screening. That's why we mailed you an invitation to have a liver ultrasound – one of the screening tests for liver cancer. This screening test can find many liver problems early, so problems can be treated before they get serious.</p> <p>You should have a liver ultrasound every 6 months. We can submit a request now and the Radiology department will contact you to schedule your next liver ultrasound for 6 months after your last one.</p> <p>We're inviting you to have a liver ultrasound – one of the screening tests for liver cancer. This screening test can find many liver problems early, so problems can be treated before they get serious. Research has shown that this test can have big benefits. If everyone who may have liver disease did this test every 6 months, there would be many fewer deaths from liver cancer.</p> |                                                                                                     |                                                     |                 |
| 17 | After receiving this additional information, are you interested in having a liver ultrasound?                                                                                                                                                                                                                                                                                                                                                                                                                                                                                                                                                                                                                                                                                                                                                                                                                                                                                                                                                                                                                                                                                                                                                                                                                                                                                                                                                                                                                                                                                                                                                                                                                                                                                                                                                                                                                                                                                                                                                                                                                                                                                                                                                                                                                                         | <p>No, never interested</p> <p>No, not interested now</p> <p>Maybe later</p> <p>Yes, interested</p> | <p>to 19</p> <p>to 20</p> <p>to 21</p> <p>to 23</p> |                 |
| 18 | Thank you so much for your time. Have a good <<dayevening>>.                                                                                                                                                                                                                                                                                                                                                                                                                                                                                                                                                                                                                                                                                                                                                                                                                                                                                                                                                                                                                                                                                                                                                                                                                                                                                                                                                                                                                                                                                                                                                                                                                                                                                                                                                                                                                                                                                                                                                                                                                                                                                                                                                                                                                                                                          | END CALL                                                                                            | NH                                                  |                 |
| 19 | Thank you for speaking with me today. We will remove you from our contact list, but please consider talking to your doctor about liver cancer testing. Don't hesitate to raise any concerns you may have. Have a good «dayevening».                                                                                                                                                                                                                                                                                                                                                                                                                                                                                                                                                                                                                                                                                                                                                                                                                                                                                                                                                                                                                                                                                                                                                                                                                                                                                                                                                                                                                                                                                                                                                                                                                                                                                                                                                                                                                                                                                                                                                                                                                                                                                                   | END CALL                                                                                            | OPT                                                 | CENSOR          |
| 20 | Thank you for speaking with me today. We will make a note that you are not interested at this time, but please consider talking to your doctor about liver cancer testing. Don't hesitate to raise any concerns you may have. Have a good «dayevening».                                                                                                                                                                                                                                                                                                                                                                                                                                                                                                                                                                                                                                                                                                                                                                                                                                                                                                                                                                                                                                                                                                                                                                                                                                                                                                                                                                                                                                                                                                                                                                                                                                                                                                                                                                                                                                                                                                                                                                                                                                                                               | END CALL                                                                                            | NI                                                  | INVITE IN 3 MO. |

|    |                                                                                                                                                                                                                                                                                               |            |       |                                       |
|----|-----------------------------------------------------------------------------------------------------------------------------------------------------------------------------------------------------------------------------------------------------------------------------------------------|------------|-------|---------------------------------------|
| 21 | Thank you for speaking with me today. We will make a note that you may be interested in the future. If you would like to call us back, you can do so at: «projnum». Have a good «dayevening».                                                                                                 | END CALL   | ML    | INVITE IN 3 MO.                       |
| 22 | Thank you so much for your time. We will resend the letter and call you back. Have a good <<dayevening>>.                                                                                                                                                                                     | END CALL   | PC    |                                       |
| 23 | Parkland Financial Assistance (previously Parkland Health Plus) and private insurance usually covers part, if not all, of the cost of a liver ultrasound. Do you have Parkland Financial Assistance or private insurance?                                                                     | No         | to 24 | [QualifyCriteriaMetYN, dte_consented] |
|    |                                                                                                                                                                                                                                                                                               | Don't know | to 24 |                                       |
|    |                                                                                                                                                                                                                                                                                               | Yes        | to 25 |                                       |
| 24 | Okay. I can give you the number to Parkland's Financial Services so you can ask what your coverage will be. It is «finacialnum». We will make a note to contact you again in the future. If you would like to call us back, you can do so at: «projnum». Have a good «dayevening».            | END CALL   | PFS   | INVITE IN 3 MO.                       |
| 25 | Okay. We will submit a request. <<The Radiology department will contact you by phone in about a week to schedule the appointment for your liver ultrasound.>>The blood test will be scheduled for the same day as your ultrasound. It will be in the main Parkland lab after your ultrasound. | END CALL   | C     | REQUEST ORDER                         |
|    | If you would like to call us back, you can do so at: «projnum». Have a good «dayevening».                                                                                                                                                                                                     |            |       |                                       |

Supplemental Table. Criteria for inclusion of participants

|                            |                                      |                                                                                                                        |                                                                       |
|----------------------------|--------------------------------------|------------------------------------------------------------------------------------------------------------------------|-----------------------------------------------------------------------|
| Documented cirrhosis       | Cirrhosis                            | ICD-9: 571.2 and/or 571.5                                                                                              | N/A                                                                   |
|                            | Cirrhosis complication               | ICD-9: 456.0, 456.1, 456.2, 456.21, 567.23, 572.2, 572.3                                                               |                                                                       |
| Undiagnosed cirrhosis      | Hepatitis B                          | ICD-9: 070.2, 070.3<br>Lab Values: Hepatitis B Surface Antigen, Hepatitis B Viral Load                                 | Include if:<br>APRI $\geq$ 1.5<br>Platelet count < 300<br>AST < 1,000 |
|                            | Hepatitis C                          | ICD-9: 070.4, 070.5, 070.7<br>Lab Values: Positive Hepatitis C Genotype, Hepatitis C Viral Load                        |                                                                       |
|                            | Alcohol abuse                        | ICD-9: 291.4, 291.89, 303.0, 303.00, 303.01, 303.02, 303.03, 303.9, 303.91, 303.92, 303.93, 305.0, 305.1, 305.2, 305.3 |                                                                       |
|                            | Metabolic syndrome                   | ICD-9: 277.7                                                                                                           |                                                                       |
|                            | Alcoholic fatty liver                | ICD-9: 571.0, 571.1                                                                                                    |                                                                       |
|                            | Non-alcoholic fatty liver disease    | ICD-9: 571.8, 571.9                                                                                                    |                                                                       |
|                            | Obesity                              | ICD-9: 278.00, 278.01, 278.02                                                                                          |                                                                       |
|                            | Primary biliary cirrhosis (PBC)      | ICD-9: 571.6                                                                                                           |                                                                       |
|                            | Primary sclerosing cholangitis (PSC) | ICD-9: 576.1                                                                                                           |                                                                       |
|                            | Hereditary hemochromatosis (HFE)     | ICD-9: 275.01                                                                                                          |                                                                       |
| Autoimmune hepatitis (AIH) | ICD-9: 571.42                        |                                                                                                                        |                                                                       |



**Supplemental Figure 1:** Study Outcomes Flow Diagram for Usual Care (Arm 1)

**Supplemental Figure 2:** Study Outcomes Flow Diagram for Outreach Alone (Arm 2)

**Supplemental Figure 3:** Study Outcomes Flow Diagram for Outreach and Patient Navigation (Arm 3)

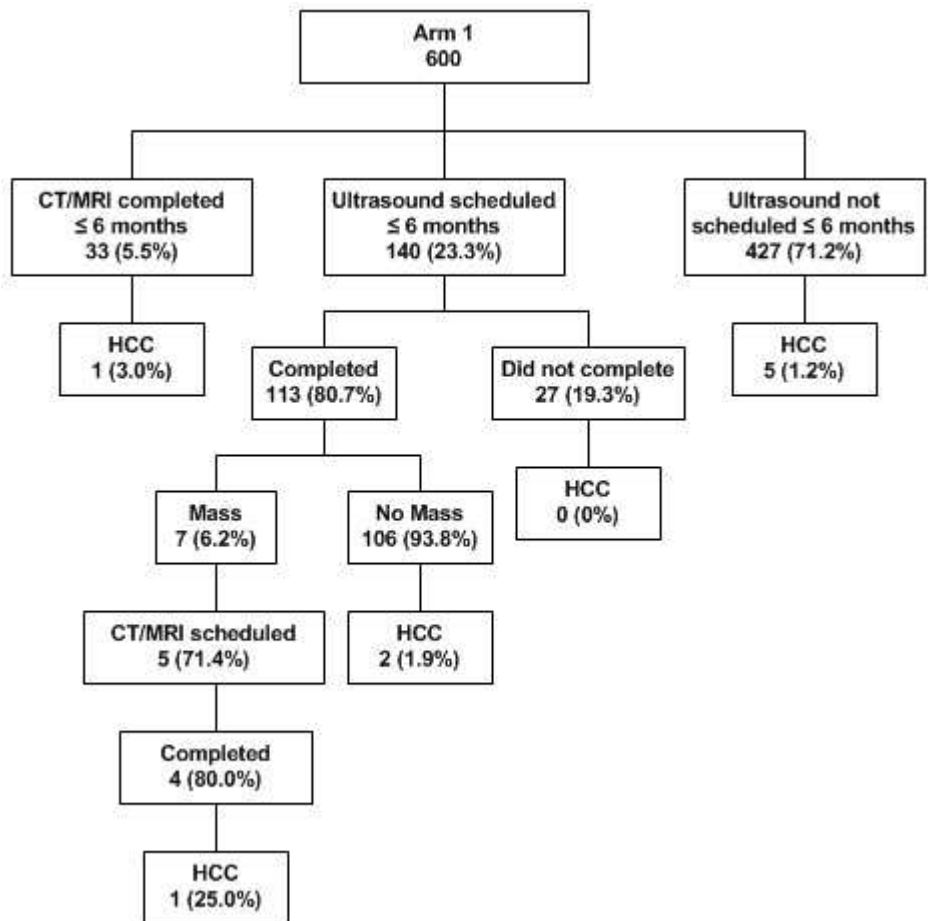

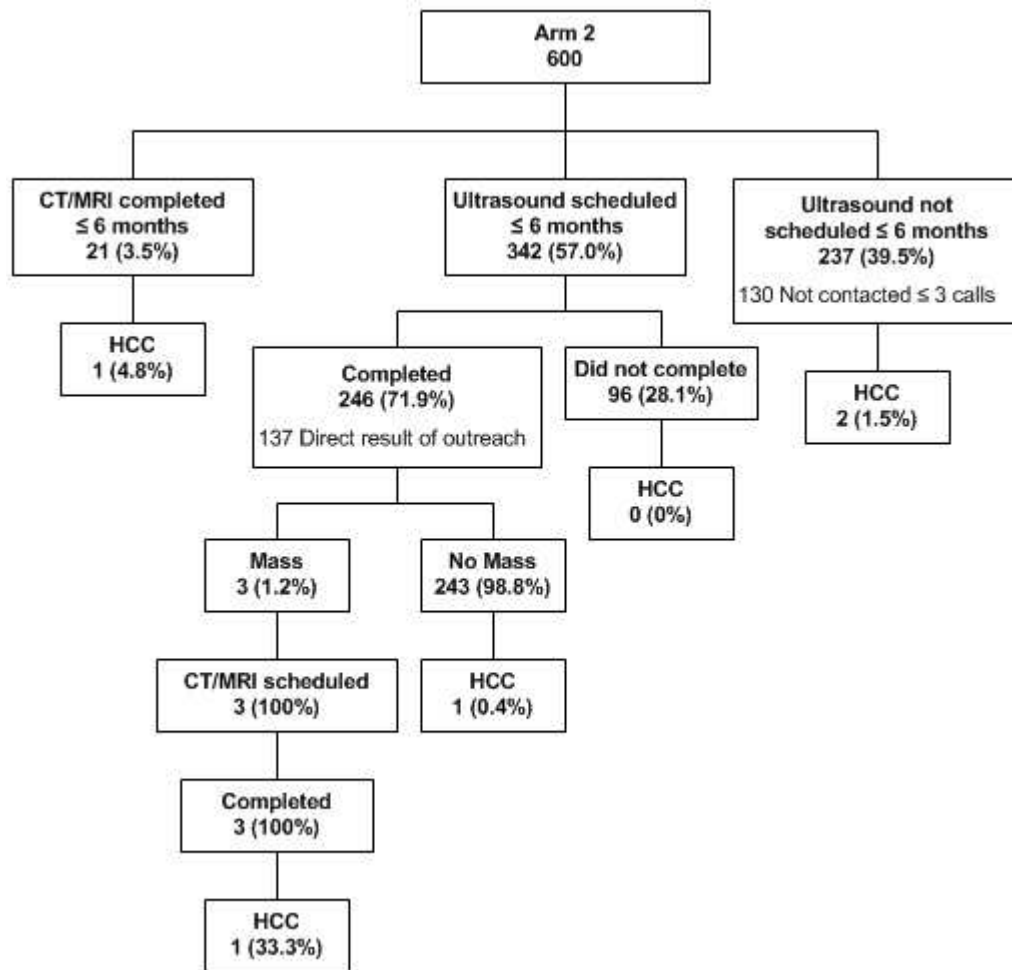

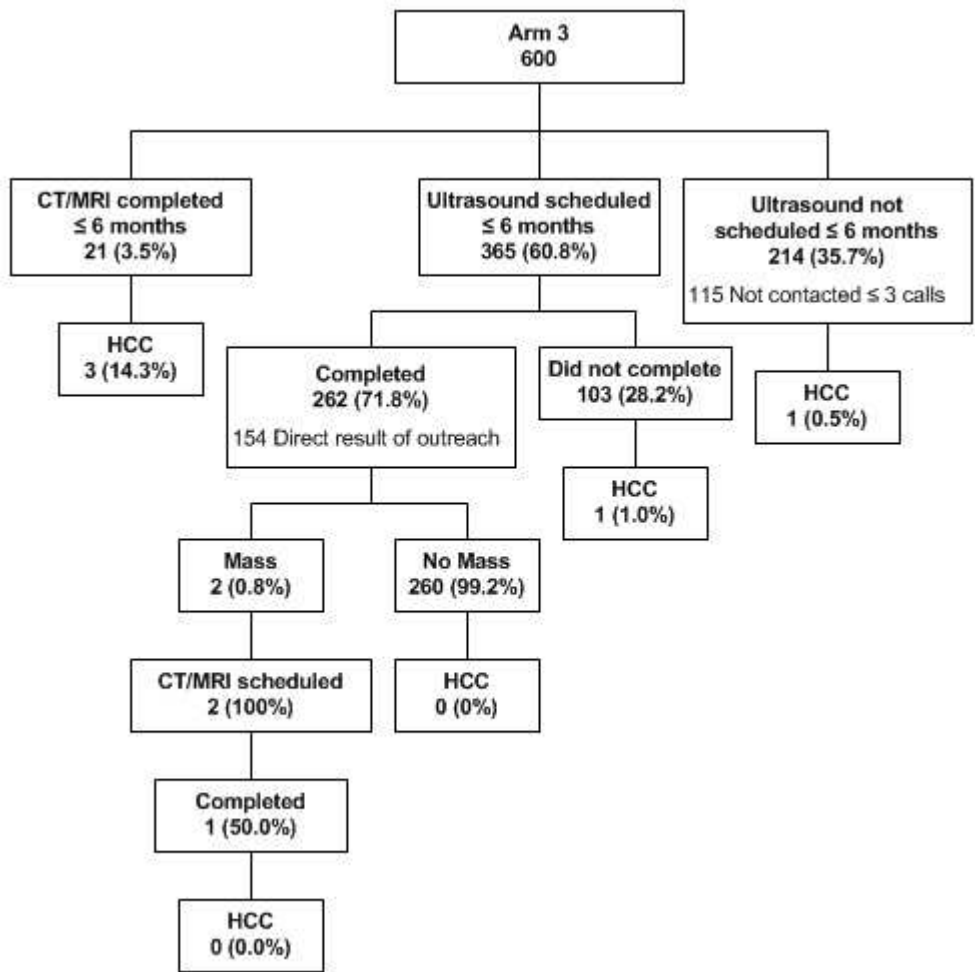

Supplement: NIHMS828257-supplement-01.pdf [file NIHMS828257-supplement-01.pdf]
